# Gene expression microarray profiles of cumulus cells in lean and overweight-obese polycystic ovary syndrome patients

Shlomit Kenigsberg<sup>1,†</sup>, Yaakov Bentov<sup>2,†,‡</sup>, Vered Chalifa-Caspi<sup>3</sup>, Gad Potashnik<sup>2</sup>, Rivka Ofir<sup>1</sup>, and Ohad S. Birk<sup>1,4,5</sup>

<sup>1</sup>The Morris Kahn Laboratory of Human Genetics, National Institute for Biotechnology in the Negev, Ben-Gurion University, Beer-Sheva 84105, Israel <sup>2</sup>Fertility and IVF Unit, Soroka University Medical Center, Beer-Sheva 84101, Israel <sup>3</sup>Bioinformatics Core Facility at the National Institute for Biotechnology in the Negev (NIBN), Ben-Gurion University, Beer-Sheva 84105, Israel <sup>4</sup>Genetics Institute at Soroka University Medical Center, Faculty of Health Sciences, Ben-Gurion University, PO Box 151, Beer-Sheva 84105, Israel

<sup>5</sup>Corresponding author: Tel: +972 8-6403439; Fax: +972 8-6400042; Email: obirk@bgu.ac.il

**ABSTRACT:** The aim of this work was to study gene expression patterns of cultured cumulus cells from lean and overweight-obese polycystic ovary syndrome (PCOS) patients using genome-wide oligonucleotide microarray. The study included 25 patients undergoing *in vitro* fertilization and intra-cytoplasmic sperm injection: 12 diagnosed with PCOS and 13 matching controls. Each of the groups was subdivided into lean (body mass index (BMI) < 24) and overweight (BMI > 27) subgroups. The following comparisons of gene expression data were made: lean PCOS versus lean controls, lean PCOS versus overweight PCOS, all PCOS versus all controls, overweight PCOS versus overweight controls, overweight controls versus lean controls and all overweight versus all lean. The largest number of differentially expressed genes (DEGs), with fold change (FC)  $|FC| \geq 1.5$  and  $P$ -value < 0.01, was found in the lean PCOS versus lean controls comparison (487) with most of these genes being down-regulated in PCOS. The second largest group of DEGs originated from the comparison of lean PCOS versus overweight PCOS (305). The other comparisons resulted in a much smaller number of DEGs (174, 109, 125 and 12, respectively). In the comparison of lean PCOS with lean controls, most DEGs were transcription factors and components of the extracellular matrix and two pathways, Wnt/ $\beta$ -catenin and mitogen-activated protein kinase. When comparing overweight PCOS with overweight controls, most DEGs were of pathways related to insulin signaling, metabolism and energy production. The finding of unique gene expression patterns in cumulus cells from the two PCOS subtypes is in agreement with other studies that have found the two to be separate entities with potentially different pathophysiologies.

**Key words:** PCOS / cumulus / microarray / infertility / insulin resistance

## Introduction

Polycystic ovary syndrome (PCOS) is a common heterogeneous endocrinopathy in women of reproductive age, which is mostly associated with ovulation failure. The PCOS phenotype is variable and may include polycystic ovaries, hirsutism, hyperandrogenism and pre-diabetes (Franks, 1995). The phenotype of PCOS and its impact on reproductive function are profoundly affected by obesity which, in turn, has both genetic and environmental influences (Salehi *et al.*, 2004). PCOS is considered by some authors to be a unique representation of the metabolic syndrome (Sam and Dunaif, 2003).

The etiology of PCOS remains unclear (Diamanti-Kandarakis and Piperi, 2005; Vink *et al.*, 2006); however, the observation of familial segregation of PCOS is consistent with a genetic basis for this disorder. Studies in sisters have shown that hyperandrogenism is the component with the strongest concordance (Legro *et al.*, 1998; Franks *et al.*, 2006). More than 50 candidate genes have been studied for association with the syndrome, but none have been proven to play a definitive role (Escobar-Morreale *et al.*, 2005). Association and linkage studies have provided evidence for linkage disequilibrium at D19S884, a dinucleotide-repeat marker, closely linked to the insulin receptor gene locus on chromosome 19p13.2

<sup>†</sup>The first two authors contributed equally to the study.

<sup>‡</sup>Recipient of the American Physician Fellowship for Medicine in Israel.

(Stewart et al., 2006). It has been suggested that X-linked genes and chromosome X inactivation are involved in the determination of the distribution and presentation of the syndrome (Hickey et al., 2006).

Studies comparing gene expression arrays in tissues of PCOS and control patients have reported similar pathways for differentially expressed genes (DEGs) in theca cells (Wood et al., 2004), whole ovaries (Jansen et al., 2004; Oksjoki et al., 2005) and oocytes (Wood et al., 2007). Comparative analysis revealed genes involved in the Wnt/ $\beta$ -catenin and mitogen-activated protein kinase (MAPK)-signaling pathways, retinoic acid metabolism and apoptosis. However, to the best of our knowledge, gene expression in cumulus cells isolated from PCOS patients has never been studied.

The cumulus cells are a subset of granulosa cells which maintain an intimate connection with the oocyte and are responsible for providing several trophic and metabolic factors to the pre-ovulatory oocyte. Both cumulus and granulosa cells are the major source of estradiol. High levels of estradiol prevent the rise of follicle-stimulating hormone (FSH), an essential factor for follicular growth and ovulation induction, which in turn leads to anovulation, a major feature of PCOS. Indeed, the first line of treatment for PCOS, Clomiphene citrate or Letrozole, acts by reducing the effect of estrogen in order to treat anovulation (Speroff and Fritz, 2005).

Cultured luteinized granulosa cells from PCOS have been shown to maintain their unique functional qualities, despite being separated from the rest of the follicular structures, for as long as 12 days (Agrawal et al., 2002). However, unlike the granulosa cells which need to be isolated from the follicular fluid and might include theca cells and lymphocytes, cumulus cells are well-defined, homogeneous cells (Quinn et al., 2006). Therefore, in the current study, we used cultured cumulus cells isolated from patients undergoing *in vitro* fertilization (IVF) in order to minimize the effect of the hormonal stimulation. The patients, divided into PCOS and control groups, were further subdivided into four subgroups: lean PCOS, overweight-obese PCOS, lean controls and overweight-obese controls. We hypothesized that comparisons of gene expression in cumulus cells from PCOS patients versus controls, and between the lean PCOS and obese PCOS subgroups, would elucidate distinct gene expression patterns, allowing insights to molecular mechanisms of PCOS.

## Materials and Methods

### Patient selection and tissue collection

This study was approved by the Institutional Ethical Review Board of Soroka Medical Center and the committee for genetic experiments of the Israeli Ministry of Health. All the patients signed an informed consent form. Twenty-five patients were enrolled in the study (Table I):

13 PCOS patients—6 lean (LP) with body mass index (BMI) 19–24 and 7 overweight (OP) with BMI 27–34; 12 non-PCOS controls—6 lean (LN) with BMI 19–24 and 6 overweight (ON) with BMI 27–34. After quality assurance, two arrays were excluded from the analysis, one from the ON group and the other from the LP group. The average age of the patients was 31 years (range 29–32). The lean PCOS had a higher ratio of LH/FSH.

All the participants included in the study were women undergoing *in-vitro* fertilization with intra-cytoplasmic sperm injection (IVF–ICSI) at the Soroka Medical Center IVF unit. All the IVF–ICSI cycles included in the study were conducted according to the long mid-luteal GnRH agonist (Diphereline 3.75 mg, PharmaBiotech, Paris, France) protocol. Controlled ovarian stimulation was conducted with recombinant FSH (Follitropin Alfa, Serono, London, UK). The indication for ICSI treatment was combined male factor, poor fertilization rate on standard IVF or as routine for the first IVF cycle on half of the oocytes. Oocyte injections and embryo cultures were performed as described elsewhere (Geary and Moon, 2006). PCOS patients were diagnosed according to the Rotterdam revised criteria after ruling out secondary causes.

### Cumulus cell preparation and culture

Following oocyte retrieval, cumulus cells were mechanically stripped from the oocyte after brief exposure to 80 IU/ml hyaluronidase (Cook, Brisbane, Australia) in preparation for the ICSI procedure, by aspiration through a glass pipette with  $\sim 200 \mu\text{m}$  inner diameter (Geary and Moon, 2006). To reduce the effect of gonadotrophin on the cumulus cells, cells were cultured for 48 h in the original IVF plate, as described previously for granulosa cells (Rice et al., 2005). Briefly, the cumulus cells were washed three times with Dulbecco's modified Eagle's medium/Ham's F12 (1:1) supplemented with penicillin, streptomycin and amphotericin, and resuspended in the same medium supplemented with 10% fetal calf serum. Cells were incubated for 48 h at 37°C with 5% CO<sub>2</sub>. Medium was replaced after 24 h.

### RNA isolation

Total RNA was extracted using TRI-Reagent (MRC, Cincinnati, OH, USA) to obtain  $\sim 2 \mu\text{g}$  of RNA, which was eluted in a final volume of 20  $\mu\text{l}$ . Concentration and quality were assessed using NanoDrop ND-100 spectrophotometer (NanoDrop Technologies Inc., Wilmington, Delaware, USA). RNA was stored at  $-80^\circ\text{C}$  until further analysis.

### Microarray hybridization

RNA samples were further processed at the DNA microarray laboratory core facility, using the 'Small Sample Target Labeling Assay v.2' protocol from Affymetrix (Santa Clara, CA, USA). Briefly, biotin-labeled cRNA prepared from 50 ng RNA from each patient was fragmented and hybridized to individual U133 + 2.0 arrays using the GeneChip Fluidics Station 400 protocol, and scanned using the Agilent GeneArray Scanner (Affymetrix). Overall, 25 microarray chips were analyzed in this study.

**Table I** Details of the subgroups of patients

| Group name                         | Group symbol | Number of patients | BMI          | LH/FSH ratio |
|------------------------------------|--------------|--------------------|--------------|--------------|
| Lean PCOS                          | LP           | 5                  | 22 $\pm$ 3   | 1.0–2.6      |
| Lean non-PCOS controls             | LN           | 6                  | 20 $\pm$ 4   | 0.4–1        |
| Overweight-obese PCOS              | OP           | 7                  | 32 $\pm$ 4.5 | 0.4–1.8      |
| Overweight-obese non-PCOS controls | NP           | 7                  | 31 $\pm$ 4.5 | 0.3–1.1      |

## Gene expression analysis

Raw CEL microarray files were read into the Affy package of affyImGUI, a graphical user interface for the analysis of Affymetrix microarray data using the Linear Modes for MicroArray data (Limma) package (Smyth, 2004). Background adjustment, quantile normalization and probe summarization were achieved by robust multiarray averaging (Irizarry *et al.*, 2003). Quality assessment was performed using R, SpotFire DecisionSite and Pertek<sup>®</sup> through distribution and box plots, scatter plots, principal component analysis and hierarchical clustering of the samples. A linear model was fitted to the expression data (the log-intensity values) for each gene. Empirical Bayes and other shrinkage methods were used to borrow information across genes, making the analyses stable even for experiments with small number of arrays. Batch information was treated using the block parameter in Limma's 'lfit' function, with a fixed value of 0.06 for the correlation. Six binary comparisons were computed in Limma: (i) lean comparison: PCOS versus non-PCOS samples (LP/LN), (ii) overweight comparison: PCOS versus non-PCOS samples (OP/ON), (iii) disease comparison: PCOS versus non-PCOS samples (PS/NP), (iv) PCOS comparison: overweight-obese versus lean (OP/LP), (v) controls comparisons: overweight-obese non-PCOS versus lean non-PCOS (ON/LN) and (vi) weight comparison: overweight-obese versus lean (O/L). The probe sets which had a *P*-value <0.01 and fold change in linear scale  $\geq |1.5|$  in at least one of the comparisons were considered as DEGs. The data were deposited in NCBI's Gene Expression Omnibus (GEO) and are accessible through GEO Series accession number GSE10946 (<http://www.ncbi.nlm.nih.gov/geo/>).

The Venn diagram was constructed using the Venny tool (Oliveros, 2007) and contains the four main comparison groups. Only probe sets with log<sub>2</sub> signal intensity >5 in at least one array, and *P* < 0.01 and fold change  $|FC| \geq 1.5$  in at least one of the comparisons, were included.

Hierarchical clustering of the genes was conducted with SpotFire, using Pearson's correlation and complete linkage.

## Gene annotation

Gene annotations were performed using the Netaffx server ([www.affymetrix.com](http://www.affymetrix.com)), and the Ovarian Kaleidoscope Database (<http://ovary.stanford.edu>) in order to find a potential role in ovarian physiology and pathogenesis of the disease.

## Quantitative polymerase chain reaction (qPCR) validation

For validation of DEGs, 200 ng of RNA were reverse-transcribed into first-strand cDNA using the Reverse-iT 1st Strand Synthesis Kit (ABgene, Epsom, UK) in final volume of 20  $\mu$ l. Duplicate samples of pooled cDNA from three patients were used for the PCR. Gene-specific primers were designed for the corresponding sequence of probe sets (see list of primers in Table II). The reaction was carried out using Absolute QPCR SYBR green (ABgene) in a final volume of 15  $\mu$ l on the Corbett Rotorgene 3000 (Corbett Life Science, Australia). Cycling conditions were: 94°C for 15 min, followed by 35 cycles of 94°C for 30 s, 65°C for 15 s and 72°C for 30 s, and a final melting step (78–99°C). The fluorescence crossing threshold (Ct) value was calculated with Rotorgene 3000 system software. The calculation of relative change in mRNA was performed with the efficiency delta-delta Ct method (Pfaffl, 2001), with normalization for the housekeeping gene GAPDH as described elsewhere (Fleige *et al.*, 2006).

## Results

Cumulus cells from each of the participants were cultured for 48 h under the same conditions, followed by RNA extraction. RNA from

each of the participants was analyzed on a separate microarray chip. Six comparisons were made: lean PCOS versus lean controls (LP/LN), overweight PCOS versus overweight controls (OP/ON), all PCOS versus all controls (PS/NP), overweight PCOS versus lean PCOS (OP/LP), overweight non-PCOS versus lean non-PCOS (ON/LN) and overweight versus lean (O/L). The Venn diagram (Fig 1) describes the number of DEGs with a *P*-value <0.01 and  $|FC| \geq 1.5$  found with each of the comparisons. The numbers in the overlapping parts of the circles represent the number of genes that were differentially expressed in respective comparisons. Tables A1 (Appendix) contain the probe sets that were differentially expressed in each of the comparisons, the genes they represent, their relative FC, *P*-value and annotation. Due to the length of the gene list, only genes with a fold change greater than two are shown. The full list of DEGs is available upon request.

The LP/LN comparison included 487 probe sets, 78% (375/487) of which showed decreased expression in lean PCOS cumulus cells. Note that 96% of the genes that were annotated as transcription factors were down-regulated in PCOS (44/46). The most prominent pathways in this group were the Wnt/ $\beta$ -catenin and MAPK-signaling pathways, with 27 related genes. These included genes such as *TCF7L2*, *DACT1* and *WNT5a*. Interestingly, a group of genes encoding extracellular matrix constituents and proteins of the innate immune system showed increased expression in the LP cells.

The OP/ON comparison yielded 174 DEGs with 60% of them (105/174) demonstrating decreased expression in the overweight PCOS group. Up-regulation of genes associated with various insulin-signaling pathways, diabetes and obesity was observed, including the insulin receptor (INSR), the leptin receptor (LEPR) and genes participating in the Dentatorubropallidolusian atrophy (DRPLA) pathway, which mediates insulin's effect on cells (Okamura-Oho *et al.*, 1999).

The comparison of all PCOS with all non-PCOS (PS/NP), disregarding the BMI criterion, yielded only 109 probe sets, 55% of which (60/109) demonstrated decreased expression in the PCOS group. The comparison of obese with lean PCOS samples (OP/LP) revealed 305 DEG probe sets, 68% of which (206/305) demonstrated increased expression in the overweight PCOS group compared with the lean PCOS group.

Eighty-five of the DEGs overlapped in the LP/LN and LP/OP comparisons, representing 17 (85/487) and 28% (85/305) of the genes,

**Table II** qPCR primers

| Gene name | Primers                 |
|-----------|-------------------------|
| MRO-F     | GAAAGGTTTGGGTTCTTCTTCAT |
| MRO-R     | TGGAGAACAGGCTTGAATGTTGT |
| HAPLN1-F  | TCACACAGAGGTGGCAATGT    |
| HAPLN1-R  | TGCCTCCCTTCAGAAACACT    |
| CALR-F    | TGGAAGACGATTGGGACTTC    |
| CALR-R    | CTGAATCACTGGGGTTCC      |
| OGT-F     | CCTGCCCCAGAACCCTATCA    |
| OGT-R     | GCAAGTGAGCTGGGATGCTG    |
| FLNA-F    | AAAGTCACAGGCCCTCTCTC    |
| FLNA-R    | CCTTGAGCAGGTAGGACACGC   |

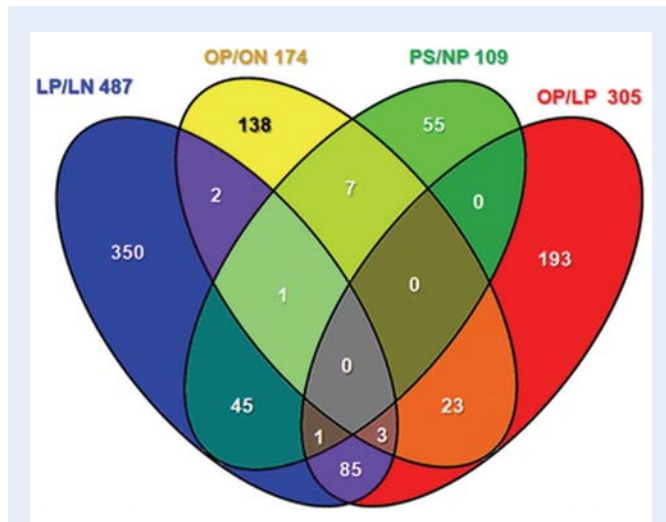

**Figure 1** Venn diagram representing the number of DEGs in each comparison and the overlaps between the four main comparison groups. Probe sets with  $P < 0.01$  and  $|FC| \geq 1.5$  in at least one of the comparisons are included.

respectively. Only six genes overlapped between the lean comparison (LP/LN) and the overweight comparison (OP/ON); five of these exhibited inverse expression patterns in the two groups (*MTRFIL*, *HNRPD*, *ROBO3*, *FTO* and *SQSTM1*). Hundred and twenty-five DEGs were found in the comparison of overweight non-PCOS with lean non-PCOS (ON/LN), 51 of those genes overlapped with the group of DEGs that resulted from the comparison of lean PCOS with the lean non-PCOS. The comparison of all overweight with all lean patients yielded only 12 genes, all of which had a fold change lower than two.

## Quantitative PCR

To validate the microarray data, five of the DEGs were chosen for validation by qPCR: *MRO*, *HAPLN1*, *OGT*, *CALR* and *FLNA* (Fig. 2). The criteria for their selection were a high FC value in one of the groups and the relevance of the gene to future study of PCOS pathogenesis. For all five genes, the qPCR results were in line with the microarray data. Interestingly, the differential expression of *MRO* demonstrated by qPCR was not as prominent as in the microarray. PCR analysis using primers for exons 4–9 (data not shown), following sequencing, revealed multiple splice variants. The full transcript exhibited significantly higher expression in the LP group. The significance of this finding and its potential role in PCOS pathology are currently under investigation.

## Discussion

This is the first report of differential gene expression profiles in cultured cumulus cells taken from PCOS and non-PCOS patients. The comparison involved a homogeneous group of PCOS patients and controls, testing of specific and unique synchronized cells under identical culture conditions. We chose to analyze cumulus cells despite their relatively smaller number in comparison with other follicular cells for several reasons: cumulus cells are a unique subset of granulosa cells that are in direct contact with the oocyte throughout its development. These cells play a major role in the control of oocyte

metabolism, and therefore it is likely that malfunction of these cells might play a role in PCOS. Moreover, due to the method of separation, the cumulus cells are more homogeneous with almost no contamination with other cells. Granulosa cells on the other hand, despite meticulous efforts to isolate them, would generally contain theca and blood cells. Homogeneity of the examined tissue is crucial for a valid comparison of gene expression.

The cells were retrieved with the oocytes following intense ovarian stimulation, as part of an IVF procedure. The separation of the cumulus cells from the oocyte was done with a combination of a short exposure to hyaluronidase and mechanical stripping. We decided to culture the cumulus cells for 48 h under identical conditions in order to achieve homogeneous extracellular environment, attenuating the effects of the hormonal stimulation and stripping. We hypothesized that differences in gene expression under controlled and identical conditions will most probably be weaker but would best reflect differences that arise from the cells' unique innate function. The manipulations to which the cumulus cells were exposed most probably affected their gene expression; however, as cells of all experimental groups underwent the same identical procedures, it is unlikely that these manipulations are the cause of the differential gene expression patterns.

The following discussion relates to the list of DEGs with a  $|FC| \geq 1.5$ , which provides a detailed comparison of the groups. Despite the relatively large number of DEGs, choosing a higher FC would have resulted in a loss of a significant amount of information mainly in overlapping genes and gene pathways. We included DEGs with  $|FC|$  higher than two in Table A1 only due to the length of the original list of genes. The two comparisons that showed the largest number of DEGs were the lean PCOS versus lean controls (487) and the overweight PCOS versus lean PCOS (305). The comparison of overweight PCOS with overweight controls resulted in a smaller number of DEGs (174). Comparison of the entire group of PCOS patients with the entire group of controls, irrespective of weight,

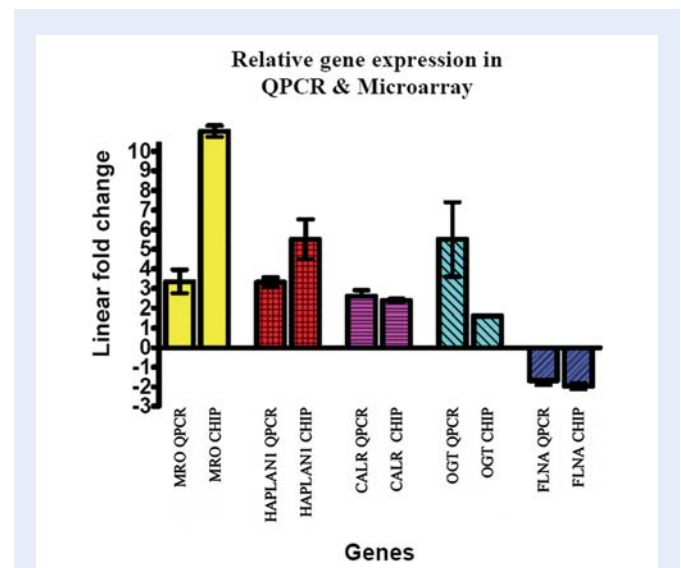

**Figure 2** A histogram showing qPCR and microarray results for selected genes: *MRO* (maestro), *HAPLN1* (hyaluronan and proteoglycan link protein 1), *CALR* (calreticulin), *OGT* (GlcNAc transferase) and *FLNA* (filamin A) compared with the GAPDH expression. The Y-axis represents relative linear fold change.



yielded the smallest group (109) of DEGs. These findings suggest that the most unique group in these comparisons was the lean PCOS. The expression of the genes in this group's cumulus cells was very different from both the overweight PCOS and the same-weight controls. The smaller number of differential genes in the more general comparison of all PCOS with all controls suggests that when weight is disregarded, the difference between PCOS and non-PCOS cumulus cells becomes less pronounced. Furthermore, the cumulus cells from the overweight PCOS group were most similar in terms of gene expression pattern to the cumulus cells of overweight controls. Taken together, it may be suggested that the lean PCOS group is the source of the unique characteristics of 'authentic' PCOS, while there is a similarity in cumulus cell function in the overweight patients of both groups. Moreover, the list of DEGs from the LP/LN and OP/LP comparisons contained 85 overlapping genes. This may suggest that the groups being compared with the lean PCOS group are not as different from one another.

In recent years, there have been a number of studies suggesting similarities in pathogenesis between obesity and PCOS (Morales *et al.*, 1996; San Millan *et al.*, 2004; Magnotti and Futterweit, 2007). Other studies have highlighted the differences that exist between lean and obese PCOS patients, demonstrating higher levels of basal LH, as was shown in this study, and a higher LH response to GnRH (Dale *et al.*, 1992) as well as a higher growth hormone pulse amplitude in lean PCOS. In contrast, obese PCOS individuals demonstrated a higher rate of insulin resistance and the presence of  $\beta$ -cell dysfunction, lower levels of sex hormone binding globulin (SHBG), lower concentration of the insulin-like growth factor binding protein I (IGFBP1), and higher ratio of estradiol and testosterone to SHBG (Morales *et al.*, 1996). The recent increase in the incidence of obesity worldwide has been accompanied by a parallel increase in the incidence of anovulatory infertility due to PCOS (Alvarez-Blasco *et al.*, 2006). Furthermore, the first line of treatment for overweight PCOS is weight reduction, which has proven to be an effective treatment for resumption of ovulation (Guzick, 2007).

The analysis of gene annotations in this study resulted in the identification of several important pathways and groups of genes that shed light on molecular processes in PCOS. Genes of the Wnt/ $\beta$ -catenin- and MAPK-signaling pathways were generally down-regulated in the lean PCOS group when compared with PCOS controls. Wnts are secreted extracellular signaling molecules that exert local control over diverse developmental processes, cell-fate specification, differentiation and regulation of cell-to-cell interactions through  $\beta$ -catenin. Together with the MAPK-signaling pathway, they are known to function in gender differentiation, folliculogenesis and ovulation (Richards *et al.*, 2002). For example, *TCF7L2*, a transcription factor in the Wnt pathway whose expression was lower in lean PCOS cells compared with lean controls, forms a complex with the androgen receptor (AR) and  $\beta$ -catenin, providing a mechanism for cooperative and selective gene regulation by AR and the Wnt/ $\beta$ -catenin-Tcf pathway (Amir *et al.*, 2003). Several studies described altered expression of a few members of the Wnt and MAPK pathways in other cell types of PCOS patients (Jansen *et al.*, 2004; Wood *et al.*, 2004; Corton *et al.*, 2006). It should be noted that each of those studies examined different tissues at different stages of the menstrual cycle. Another group of DEGs that were prominent in the comparison of lean PCOS with lean controls were genes encoding proteins of the extracellular matrix and proteins with significant roles in O- and N-glycosylation (a key step in extracellular-matrix

assembly). The extracellular matrix plays a major role in folliculogenesis (reviewed in Irving-Rodgers, 2005). For example, transcript levels of the hyaluronan and proteoglycan link protein I (*HAPLN1*) were significantly up-regulated in the lean PCOS group. *HAPLN1* is induced by gonadotrophins and plays an important role in cumulus expansion; this finding might explain in part the increased responsiveness of PCOS cumulus cells to gonadotrophins (Kobayashi *et al.*, 1999).

The comparison of overweight PCOS versus overweight controls yielded a group of genes related to the insulin-signaling system whose transcript levels were up-regulated in the OP group. Among them are *INSR*, *IRS1* and the fat-mass and obesity-associated gene (*FTO*), whose variant rs9939609 has been shown to be associated with PCOS (Barber *et al.*, 2008). In the same comparison, down-regulation of transcript levels was demonstrated for a group of genes encoding components of the cells energy system signaling, such as proteins of the mitochondrion, the oxidative phosphorylation system and biosynthesis of purines and pyrimidines.

## Concluding remarks

Our results support the largely accepted tenet that PCOS patients who do not suffer from the co-morbidity of obesity represent the authentic syndrome with its unique characteristics. Obesity may be regarded as modifier of the syndrome or as a separate pathological mechanism that results in similar consequences. Analyses of individual gene expression levels at the mRNA level are always prone to personal variation. The fact that comparison of the entire PCOS group with healthy controls (without taking BMI into consideration) revealed significantly less DEGs, implies that grouping the individuals according to BMI reduces variability. Thus, our data support previous notions that PCOS in lean and obese individuals should be regarded as separate subentities. Further large-scale molecular studies and subgrouping PCOS patients into more homogeneous groups may provide a better understanding of the molecular pathophysiology of this syndrome.

## Acknowledgements

The authors thank Yael Sunin, Sarit Albuteino, Iris Har-Vardi and Tatiana Rabinski for their excellent technical assistance.

## Funding

This work was supported by the Ben-Gurion University Faculty of Health Sciences research fund (to Y.B., S.K., G.P. and O.S.B), NIBN research grant (S.K. and O.S.B) and the Morris Kahn Family Foundation for Humanitarian Support.

## References

- Agrawal R, Jacobs H, Payne N, Conway G. Concentration of vascular endothelial growth factor released by cultured human luteinized granulosa cells is higher in women with polycystic ovaries than in women with normal ovaries. *Fertil Steril* 2002;**78**:1164–1169.
- Alvarez-Blasco F, Botella-Carretero JL, San Millan JL, Escobar-Morreale HF. Prevalence and characteristics of the polycystic ovary syndrome in overweight and obese women. *Arch Intern Med* 2006;**166**:2081–2086.

- Amir AL, Barua M, McKnight NC, Cheng S, Yuan X, Balk SP. A direct  $\beta$ -catenin-independent interaction between androgen receptor and T cell factor 4. *J Biol Chem* 2003;**278**:30828–30834.
- Barber TM, Bennett AJ, Groves CJ, Sovio U, Ruokonen A, Martikainen H, Pouta A, Hartikainen AL, Elliott P, Lindgren CM et al. Association of variants in the fat mass and obesity associated (FTO) gene with polycystic ovary syndrome. *Diabetologia* 2008;**51**:1153–1158.
- Corton M, Botella-Carretero JL, Benguria A, Villuendas G, Zaballos A, San Millan JL, Escobar-Morreale HF, Peral B. Differential gene expression profile in omental adipose tissue in women with polycystic ovary syndrome. *J Clin Endocrinol Metab* 2007;**92**:328–337.
- Dale PO, Tanbo T, Vaaler S, Abyholm T. Body weight, hyperinsulinemia, and gonadotropin levels in the polycystic ovarian syndrome: evidence of two distinct populations. *Fertil Steril* 1992;**58**:487–491.
- Diamanti-Kandaraki E, Piperi C. Genetics of polycystic ovary syndrome: searching for the way out of the labyrinth. *Hum Reprod Update* 2005;**11**:631–643.
- Escobar-Morreale HF, Luque-Ramirez M, San Millan JL. The molecular-genetic basis of functional hyperandrogenism and the polycystic ovary syndrome. *Endocr Rev* 2005;**26**:251–282.
- Fleige S, Walf V, Huch S, Prgomet C, Sehm J, Pfaffl MW. Comparison of relative mRNA quantification models and the impact of RNA integrity in quantitative real-time RT–PCR. *Biotechnol Lett* 2006;**28**:1601–1613.
- Franks S. Polycystic ovary syndrome. *N Engl J Med* 1995;**333**:853–861.
- Franks S, McCarthy MI, Hardy K. Development of polycystic ovary syndrome: involvement of genetic and environmental factors. *Int J Androl* 2006;**29**:278–285. (Discussion 86–90).
- Geary S, Moon YS. The human embryo *in vitro*: recent progress. *J Reprod Med* 2006;**51**:293–302.
- Guzick DS. Ovulation induction management of PCOS. *Clin Obstet Gynecol* 2007;**50**:255–267.
- Hickey TE, Legro RS, Norman RJ. Epigenetic modification of the X chromosome influences susceptibility to polycystic ovary syndrome. *J Clin Endocrinol Metab* 2006;**91**:2789–2791.
- Irizarry RA, Hobbs B, Collin F, Beazer-Barclay YD, Antonellis KJ, Scherf U, Speed TP. Exploration, normalization, and summaries of high density oligonucleotide array probe level data. *Biostatistics* 2003;**4**:249–264.
- Irving-Rodgers HF, Rodgers RJ. Extracellular matrix in ovarian follicular development and disease. *Cell Tissue Res* 2005;**322**:89–98.
- Jansen E, Laven JS, Dommerholt HB, Polman J, van Rijt C, van den Hurk C, Westland J, Mosselman S, Fauser BC. Abnormal gene expression profiles in human ovaries from polycystic ovary syndrome patients. *Mol Endocrinol* 2004;**18**:3050–3063.
- Kobayashi H, Sun GW, Hirashima Y, Terao T. Identification of link protein during follicle development and cumulus cell cultures in rats. *Endocrinology* 1999;**140**:3835–3842.
- Legro RS, Driscoll D, Strauss JF 3rd, Fox J, Dunaif A. Evidence for a genetic basis for hyperandrogenemia in polycystic ovary syndrome. *Proc Natl Acad Sci USA* 1998;**95**:14956–14960.
- Magnotti M, Futterweit W. Obesity and the polycystic ovary syndrome. *Med Clin North Am* 2007;**91**:1151–1168, ix–x.
- Morales AJ, Laughlin GA, Butzow T, Maheshwari H, Baumann G, Yen SS. Insulin, somatotrophic, and luteinizing hormone axes in lean and obese women with polycystic ovary syndrome: common and distinct features. *J Clin Endocrinol Metab* 1996;**81**:2854–2864.
- Okamura-Oho Y, Miyashita T, Ohmi K, Yamada M. Dentatorubral-pallidolysian atrophy protein interacts through a proline-rich region near polyglutamine with the SH3 domain of an insulin receptor tyrosine kinase substrate. *Hum Mol Genet* 1999;**8**:947–957.
- Oksjoki S, Soderstrom M, Inki P, Vuorio E, Anttila L. Molecular profiling of polycystic ovaries for markers of cell invasion and matrix turnover. *Fertil Steril* 2005;**83**:937–944.
- Oliveros JC. VENNY. An interactive tool for comparing lists with Venn Diagrams. 2007. <http://bioinfogp.cnb.csic.es/tools/venny/index.html>.
- Pfaffl MW. A new mathematical model for relative quantification in real-time RT–PCR. *Nucleic Acids Res* 2001;**29**:e45.
- Quinn MC, McGregor SB, Stanton JL, Hessian PA, Gillett WR, Green DP. Purification of granulosa cells from human ovarian follicular fluid using granulosa cell aggregates. *Reprod Fertil Dev* 2006;**18**:501–508.
- Rice S, Christoforidis N, Gadd C, Nikolaou D, Seyani L, Donaldson A, Margara R, Hardy K, Franks S. Impaired insulin-dependent glucose metabolism in granulosa-lutein cells from anovulatory women with polycystic ovaries. *Hum Reprod* 2005;**20**:373–381.
- Richards JS, Russell DL, Ochsner S, Hsieh M, Doyle KH, Falender AE, Lo YK, Sharma SC. Novel signaling pathways that control ovarian follicular development, ovulation, and luteinization. *Recent Prog Horm Res* 2002;**57**:195–220.
- Salehi M, Bravo-Vera R, Sheikh A, Gouller A, Poretsky L. Pathogenesis of polycystic ovary syndrome: what is the role of obesity? *Metabolism* 2004;**53**:358–376.
- Sam S, Dunaif A. Polycystic ovary syndrome: syndrome XX? *Trends Endocrinol Metab* 2003;**14**:365–370.
- San Millan JL, Corton M, Villuendas G, Sancho J, Peral B, Escobar-Morreale HF. Association of the polycystic ovary syndrome with genomic variants related to insulin resistance, type 2 diabetes mellitus, and obesity. *J Clin Endocrinol Metab* 2004;**89**:2640–2646.
- Smyth GK. Linear models and empirical bayes methods for assessing differential expression in microarray experiments. *Stat Appl Genet Mol Biol* 2004;**3**:Article 3.
- Speroff L, Fritz MA. *Clinical Gynecologic Endocrinology and Infertility*, Vol. **x**, 7th edn. Philadelphia: Lippincott Williams & Wilkins, 2005, 1334 p.
- Stewart DR, Dombroski BA, Urbanek M, Ankener W, Ewens KG, Wood JR, Legro RS, Strauss JF 3rd, Dunaif A, Spielman RS. Fine mapping of genetic susceptibility to polycystic ovary syndrome on chromosome 19p13.2 and tests for regulatory activity. *J Clin Endocrinol Metab* 2006;**91**:4112–4117.
- Vink JM, Sadrzadeh S, Lambalk CB, Boomsma DI. Heritability of polycystic ovary syndrome in a Dutch twin-family study. *J Clin Endocrinol Metab* 2006;**91**:2100–2104.
- Wood JR, Ho CK, Nelson-Degrave VL, McAllister JM, Strauss JF 3rd. The molecular signature of polycystic ovary syndrome (PCOS) theca cells defined by gene expression profiling. *J Reprod Immunol* 2004;**63**:51–60.
- Wood JR, Dumesic DA, Abbott DH, Strauss JF 3rd. Molecular abnormalities in oocytes from women with polycystic ovary syndrome revealed by microarray analysis. *J Clin Endocrinol Metab* 2007;**92**:705–713.

# Appendix

**Table A1** The DEGs with  $FC \geq |2|$  and  $P$ -value  $< 0.01$  in six comparisons: (LP/LN) lean PCOS versus lean controls; (OP/ON) overweight PCOS versus overweight controls; (PS/NP) all PCOS versus all controls; (OP/LP) overweight PCOS versus lean PCOS; (ON/LN) overweight non-PCOS versus lean non-PCOS; (O/L) overweight versus lean

| Probe set ID | Gene title                                                              | Gene symbol | Chromosomal location | LP/LN P-value | FC    | OP/ON P-value | FC   | PS/NP P-value | FC    | ON/LN P-value | FC    | OP/LP P-value | FC    | O/L P-value | FC | Gene annotation codes |
|--------------|-------------------------------------------------------------------------|-------------|----------------------|---------------|-------|---------------|------|---------------|-------|---------------|-------|---------------|-------|-------------|----|-----------------------|
| 202323_s_at  | Acyl-co-enzyme A binding domain containing 3                            | ACBD3       | Chr1q42.12           | 0.007         | -2.26 | 0.964         |      | 0.098         |       | 0.571         |       | 0.020         |       | 0.320       |    | 34,35,36              |
| 228771_at    | Adrenergic, beta, receptor kinase 2                                     | ADRBK2      | Chr22q11-12.1        | 0.109         |       | 0.194         |      | 0.680         |       | 0.007         | -2.17 | 0.995         |       | 0.054       |    | 6,10,14,16            |
| 228667_at    | 1-Acylglycerol-3-phosphate O-acyltransferase 4                          | AGPAT4      | Chr6q26              | 0.000         | -3.92 | 0.344         |      | 0.045         |       | 0.019         |       | 0.002         | 2.55  | 0.758       |    | 35                    |
| 205609_at    | Angiopoietin 1                                                          | ANGPT1      | Chr8q22.3-q23        | 0.005         | 2.21  | 0.619         |      | 0.195         |       | 0.732         |       | 0.003         | -2.29 | 0.100       |    | 14,24,27              |
| 236034_at    | Microcephaly, primary autosomal recessive 1                             | ANGPT2      | Chr8p23.1            | 0.011         |       | 0.075         |      | 0.002         | 2.35  | 0.384         |       | 0.949         |       | 0.405       |    | 14,24,27              |
| 210143_at    | Annexin A10                                                             | ANXA10      | Chr4q33              | 0.001         | 2.51  | 0.864         |      | 0.031         |       | 0.058         |       | 0.051         |       | 0.850       |    | 49                    |
| 201613_s_at  | Adaptor-related protein complex 1, gamma 2 subunit 1                    | APIG2       | Chr14q11.2           | 0.004         | -2.16 | 0.446         |      | 0.124         |       | 0.025         |       | 0.112         |       | 0.550       |    | 22,47                 |
| 224797_at    | Arrestin domain containing 3                                            | ARRDC3      | Chr5q14.3            | 0.007         | 2.41  | 0.487         |      | 0.013         |       | 0.053         |       | 0.781         |       | 0.183       |    | 18                    |
| 214012_at    | Type 1 tumor necrosis factor receptor shedding aminopeptidase regulator | ARTS-1      | Chr5q15              | 0.104         |       | 0.542         |      | 0.748         |       | 0.428         |       | 0.004         | -3.07 | 0.012       |    | 13,25,26,27,46        |
| 209935_at    | ATPase, Ca <sup>++</sup> transporting, type 2C, member 1                | ATP2C1      | Chr3q22.1            | 0.081         |       | 0.226         |      | 0.893         |       | 0.772         |       | 0.010         | -2.19 | 0.103       |    | 9,16,36,37,49         |
| 214594_x_at  | ATPase, Class I, type 8B, member 1                                      | ATP8B1      | Chr18q21-31          | 0.014         |       | 0.031         |      | 0.971         |       | 0.291         |       | 0.001         | 2.18  | 0.096       |    | 3,16                  |
| 225606_at    | BCL2-like 11 (apoptosis facilitator)                                    | BCL2L11     | Chr2q13              | 0.008         | -2.06 | 0.499         |      | 0.016         |       | 0.043         |       | 0.926         |       | 0.132       |    | 17                    |
| 200056_s_at  | Nuclear DNA-binding protein                                             | C1D         | Chr2p13-p12          | 0.676         |       | 0.004         | 2.48 | 0.039         |       | 0.018         |       | 0.907         |       | 0.246       |    | 3,17,19               |
| 224444_s_at  | Chromosome 1 open reading frame 97                                      | C1orf97     | Chr1q32.3            | 0.004         | 2.06  | 0.028         |      | 0.799         |       | 0.115         |       | 0.001         | -2.39 | 0.205       |    | —                     |
| 219004_s_at  | Chromosome 21 open reading frame 45                                     | C21orf45    | Chr21q22.11          | 0.001         | -2.20 | 0.663         |      | 0.007         | -1.56 | 0.019         |       | 0.324         |       | 0.261       |    | —                     |
| 242418_at    | Transcribed locus                                                       | C2orf27     | —                    | 0.035         |       | 0.081         |      | 0.939         |       | 0.257         |       | 0.008         | 2.10  | 0.267       |    | —                     |
| 217767_at    | Complement component 3                                                  | C3          | Chr19p13.3-p13.2     | 0.009         | 3.30  | 0.728         |      | 0.134         |       | 0.272         |       | 0.044         |       | 0.640       |    | 14,27,28,49           |
| 236826_at    | Chromosome 9 open reading frame 52                                      | C9orf52     | Chr9p22.3            | 0.007         | 2.05  | 0.664         |      | 0.043         |       | 0.635         |       | 0.047         |       | 0.445       |    | —                     |
| 227623_at    | Calcium channel, voltage-dependent, alpha 2/delta subunit 1             | CACNA2D1    | Chr7q21-q22          | 0.014         |       | 0.005         | 2.24 | 0.000         | 2.17  | 0.781         |       | 0.509         |       | 0.352       |    | 2,49                  |
| 34726_at     | Calcium channel, voltage-dependent, beta 3 subunit                      | CACNB3      | Chr12q13             | 0.001         | -2.37 | 0.034         |      | 0.372         |       | 0.002         | -2.19 | 0.015         |       | 0.589       |    | 2,16,49               |
| 212952_at    | Calreticulin                                                            | CALR*       | Chr19p13.3-2         | 0.009         | 2.29  | 0.784         |      | 0.035         |       | 0.079         |       | 0.442         |       | 0.377       |    | 3,17,21,26,37         |
| 214316_x_at  | Calreticulin                                                            | CALR*       | Chr19p13.3-3         | 0.008         | 2.46  | 0.264         |      | 0.007         | 1.86  | 0.237         |       | 0.534         |       | 0.512       |    | 3,17,2,26,37          |
| 210026_s_at  | Caspase recruitment domain family, member 10                            | CARD10      | Chr22q13.1           | 0.462         |       | 0.005         | 2.52 | 0.146         |       | 0.035         |       | 0.134         |       | 0.836       |    | 9,17,22               |
| 205476_at    | Chemokine (C-C motif) ligand 20                                         | CCL20       | Chr2q33-q37          | 0.003         | 4.99  | 0.177         |      | 0.311         |       | 0.087         |       | 0.007         | -4.05 | 0.545       |    | 14,15,27,28           |
| 200951_s_at  | Cyclin D2                                                               | CCND2       | Chr12p13             | 0.068         |       | 0.040         |      | 0.005         | -2.03 | 0.985         |       | 0.851         |       | 0.663       |    | 1,5,31                |
| 232266_x_at  | Cell division cycle 2-like 5                                            | CDC2L5      | Chr7p13              | 0.008         | -1.70 | 0.042         |      | 0.873         |       | 0.281         |       | 0.001         | 2.04  | 0.100       |    | 5                     |
| 203468_at    | Cyclin-dependent kinase (CDC2-like) 10                                  | CDK10       | Chr16q24             | 0.003         | -2.07 | 0.812         |      | 0.046         |       | 0.018         |       | 0.290         |       | 0.281       |    | 5                     |
| 213348_at    | Cyclin-dependent kinase inhibitor 1C (p57, Kip2)                        | CDKN1C      | Chr11p15.5           | 0.001         | -3.05 | 0.487         |      | 0.057         |       | 0.017         |       | 0.039         |       | 0.678       |    | 3,4,5, 7              |

Continued

Table A1 Continued

| Probe set ID | Gene title                                                                  | Gene symbol | Chromosomal location | LP/LN P-value | FC    | OP/ON P-value | FC    | PS/NP P-value | FC    | ON/LN P-value | FC    | OP/LP P-value | FC    | O/L P-value | FC | Gene annotation codes |
|--------------|-----------------------------------------------------------------------------|-------------|----------------------|---------------|-------|---------------|-------|---------------|-------|---------------|-------|---------------|-------|-------------|----|-----------------------|
| 236313_at    | Cyclin-dependent kinase inhibitor 2B (p15)                                  | CDKN2B      | Chr9p21              | 0.014         |       | 0.158         |       | 0.008         | 2.04  | 0.872         |       | 0.269         |       | 0.775       |    | 5,6,7,43              |
| 214907_at    | Carcinoembryonic antigen-related cell adhesion molecule 21                  | CEACAM21    | Chr19q13.2           | 0.001         | -4.47 | 0.268         |       | 0.003         | -2.59 | 0.234         |       | 0.172         |       | 0.827       |    | 12                    |
| 239413_at    | KIAA0912 protein                                                            | CEP152      | Chr15q21.1           | 0.004         | -2.10 | 0.347         |       | 0.007         | -1.62 | 0.162         |       | 0.413         |       | 0.509       |    | —                     |
| 219867_at    | Chondrolectin                                                               | CHODL       | Chr21q11.2           | 0.010         | -2.91 | 0.554         |       | 0.025         |       | 0.319         |       | 0.216         |       | 0.927       |    | 24                    |
| 219634_at    | Carbohydrate (chondroitin 4) sulfotransferase 11                            | CHST11      | Chr12q               | 0.003         | 2.43  | 0.881         |       | 0.030         |       | 0.094         |       | 0.171         |       | 0.663       |    | 32,52                 |
| 226736_at    | Churchill domain containing 1                                               | CHURC1      | Chr14q23.3           | 0.004         | -3.87 | 0.179         |       | 0.003         | -2.61 | 0.263         |       | 0.466         |       | 0.571       |    | 3                     |
| 219866_at    | Chloride intracellular channel 5                                            | CLIC5       | Chr6p12.1-21.1       | 0.010         | 2.20  | 0.054         |       | 0.002         | 1.93  | 0.881         |       | 0.483         |       | 0.980       |    | 37,48                 |
| 206818_s_at  | Cyclin M2                                                                   | CNNM2       | Chr10q24.33          | 0.001         | -2.18 | 0.129         |       | 0.001         | -1.81 | 0.013         |       | 0.548         |       | 0.034       |    | 37,48                 |
| 217428_s_at  | Collagen, type X, alpha 1                                                   | COL10A1     | Chr6q21-q22          | 0.919         |       | 0.008         | 5.31  | 0.066         |       | 0.137         |       | 0.172         |       | 0.865       |    | 30,49                 |
| 222008_at    | Collagen, type IX, alpha 1                                                  | COL9A1      | Chr6q12-q14          | 0.008         | -2.01 | 0.190         |       | 0.004         | -1.69 | 0.101         |       | 0.915         |       | 0.164       |    | 3,12,46               |
| 1556346_at   | Coactosin-like 1 (Dictyostelium)                                            | COTL1       | Chr16q24.1           | 0.425         |       | 0.005         | -2.23 | 0.015         |       | 0.093         |       | 0.662         |       | 0.634       |    | 37                    |
| 225129_at    | Copinell                                                                    | CPNE2       | Chr16q13             | 0.005         | -2.23 | 0.948         |       | 0.037         |       | 0.040         |       | 0.373         |       | 0.323       |    |                       |
| 228318_s_at  | Cysteine-rich PAK1 inhibitor                                                | CRIPAK      | Chr4p16.3            | 0.008         | -2.72 | 0.348         |       | 0.228         |       | 0.056         |       | 0.072         |       | 0.848       |    | 37,39,50              |
| 209981_at    | Cold shock domain containing C2, RNA binding                                | CSDC2       | Chr22q13.2-31        | 0.005         | -2.30 | 0.537         |       | 0.143         |       | 0.127         |       | 0.039         |       | 0.829       |    | 3,20,59               |
| 206754_s_at  | Cytochrome P450, family 2, subfamily B, polypeptide 7 pseudogene 1          | CYP2B7P1    | Chr19q13.2           | 0.086         |       | 0.005         | 2.72  | 0.390         |       | 0.033         |       | 0.015         |       | 0.716       |    | —                     |
| 209569_x_at  | DNA segment on chromosome 4 (unique) 234 expressed sequence                 | D4S234E     | Chr4p16.3            | 0.353         |       | 0.006         | -2.26 | 0.197         |       | 0.039         |       | 0.098         |       | 0.932       |    |                       |
| 226666_at    | Dishevelled associated activator of morphogenesis 1                         | DAAM1       | Chr14q23.1           | 0.010         | -2.23 | 0.421         |       | 0.202         |       | 0.056         |       | 0.109         |       | 0.732       |    | 1,37                  |
| 232552_at    | cDNA DKFZp686E17205                                                         | DAAM1       | —                    | 0.000         | -2.24 | 0.721         |       | 0.033         |       | 0.109         |       | 0.004         | 1.77  | 0.543       |    | 1,37                  |
| 219179_at    | Dapper, antagonist of $\beta$ -catenin, homolog 1 ( <i>Xenopus laevis</i> ) | DACT1       | Chr14q23.1           | 0.007         | -2.59 | 0.108         |       | 0.393         |       | 0.004         | -2.85 | 0.182         |       | 0.245       |    | 1                     |
| 213865_at    | Discoidin, CUB and LCCL domain containing 2                                 | DCBLD2      | Chr3q12.1 3          | 0.431         |       | 0.002         | -1.91 | 0.190         |       | 0.001         | 2.09  | 0.741         |       | 0.074       |    | 12                    |
| 207169_x_at  | Discoidin domain receptor family, member 1                                  | DDR1        | Chr6p21.3            | 0.006         | -2.16 | 0.608         |       | 0.019         |       | 0.132         |       | 0.310         |       | 0.565       |    | 12,13,16              |
| 227199_at    | DIP2 disco-interacting protein 2 homolog A ( <i>Drosophila</i> )            | DIP2A       | Chr21q22.3           | 0.002         | -2.00 | 0.175         |       | 0.207         |       | 0.007         | -1.80 | 0.064         |       | 0.481       |    | 3,36                  |
| 214724_at    | DIX domain containing 1                                                     | DIXDC1      | —                    | 0.009         | -2.01 | 0.779         |       | 0.034         |       | 0.035         |       | 0.730         |       | 0.164       |    | 1,37                  |
| 202843_at    | Dnaj (Hsp40) homolog, subfamily B, member 9                                 | DNAJB9      | Chr7q31              | 0.121         |       | 0.913         |       | 0.558         |       | 0.271         |       | 0.008         | -2.07 | 0.011       |    | 21,53                 |
| 235341_at    | Dnaj (Hsp40) homolog, subfamily C, member 3                                 | DNAJC3      | Chr13q32             | 0.000         | 3.09  | 0.599         |       | 0.002         | 1.83  | 0.029         |       | 0.027         |       | 0.759       |    | 21,53                 |
| 227084_at    | Dystrobrevin, alpha                                                         | DTNA        | Chr18q12             | 0.010         | -2.03 | 0.159         |       | 0.416         |       | 0.041         |       | 0.044         |       | 0.930       |    | 14,16                 |
| 211200_s_at  | EF-hand calcium binding domain 2                                            | EFCAB2      | Chr1q44              | 0.008         | 2.52  | 0.550         |       | 0.162         |       | 0.140         |       | 0.054         |       | 0.868       |    | —                     |
| 223608_at    | EF-hand calcium binding domain 2                                            | EFCAB2      | Chr1q44              | 0.005         | 2.79  | 0.490         |       | 0.168         |       | 0.172         |       | 0.023         |       | 0.627       |    | —                     |
| 222938_x_at  | Ectonucleotide pyrophosphatase/phosphodiesterase 3                          | ENPP3       | Chr6q22              | 0.000         | 3.16  | 0.048         |       | 0.000         | 2.31  | 0.298         |       | 0.249         |       | 0.735       |    | 16,36,38              |
| 205225_at    | Estrogen receptor 1                                                         | ESR1        | Chr6q25.1            | 0.004         | -2.28 | 0.635         |       | 0.015         |       | 0.025         |       | 0.703         |       | 0.148       |    | 3,8,14                |



|             |                                                        |             |                   |       |       |       |       |       |       |       |             |
|-------------|--------------------------------------------------------|-------------|-------------------|-------|-------|-------|-------|-------|-------|-------|-------------|
| 232174_at   | Exostoses (multiple) I                                 | EXT1        | Chr8q24.11-13     | 0.020 | 0.050 | 0.971 | 0.258 | 0.002 | 2.30  | 0.167 | 5,54        |
| 237310_at   | Exostoses (multiple) I                                 | EXT1        | Chr8q24.11        | 0.021 | 0.010 | 0.624 | 0.702 | 0.000 | 2.42  | 0.011 | 5,54        |
| 239227_at   | Exostoses (multiple) I                                 | EXT1        | Chr8q24.11-13     | 0.039 | 0.154 | 0.831 | 0.526 | 0.006 | 2.01  | 0.133 | 5,54        |
| 221959_at   | Family with sequence similarity 110, member B          | FAM110B     | Chr8q12.1         | 0.616 | 0.002 | 2.09  | 0.057 | 0.146 | 0.024 | 0.421 | —           |
| 228790_at   | Family with sequence similarity 110, member B          | FAM110B     | Chr8q12.1         | 0.509 | 0.008 | 2.28  | 0.126 | 0.225 | 0.030 | 0.382 | —           |
| 57715_at    | Family with sequence similarity 26, member B           | FAM26B      | Chr10pter-q26.12  | 0.000 | -2.12 | 0.636 | 0.031 | 0.002 | -1.90 | 0.282 | 0.128       |
| 227948_at   | FYVE, RhoGEF and PH domain containing 4                | FGD4        | Chr12p11.21       | 0.015 | 0.087 | 0.712 | 0.130 | 0.008 | 2.54  | 0.434 | 37          |
| 1557385_at  | Hypothetical protein FLJ13305                          | FLJ13305    | Chr2p15           | 0.001 | -2.08 | 0.313 | 0.002 | -1.61 | 0.018 | 0.637 | 0.147       |
| 225035_x_at | CXYorf1-related protein                                | FLJ25222    | ChrXq28;Yq12 /chr | 0.005 | -2.29 | 0.918 | 0.055 | 0.090 | 0.149 | 0.709 | 0.802       |
| 226340_x_at | CXYorf1-related protein                                | FLJ25222    |                   | 0.002 | -2.18 | 0.748 | 0.059 | 0.065 | 0.077 | 0.802 |             |
| 233929_x_at | CXYorf1-related protein                                | FLJ25222    |                   | 0.007 | -2.18 | 0.950 | 0.053 | 0.159 | 0.151 | 0.848 |             |
| 200859_x_at | Filamin A, alpha (actin binding protein 280)           | FLNA        | ChrXq28           | 0.004 | -2.12 | 0.980 | 0.059 | 0.360 | 0.031 | 0.537 | 3,8,9,24,37 |
| 1558199_at  | Fibronectin I                                          | FNI         | Chr2q34           | 0.009 | -3.06 | 0.471 | 0.222 | 0.232 | 0.023 | 0.537 | 12,30       |
| 202723_s_at | Forkhead box O1A (rhabdomyosarcoma)                    | FOXO1A      | Chr13q14.1        | 0.004 | -2.02 | 0.774 | 0.027 | 0.182 | 0.112 | 0.940 | 3,4,18      |
| 232882_at   | Forkhead box O1A/membrane-associated guanylate kinase  | FOXO1A      | Chr13q14.1        | 0.010 | -2.30 | 0.995 | 0.108 | 0.661 | 0.022 | 0.285 | 3,4,18      |
| 202748_at   | Guanylate binding protein 2, interferon inducible      | GBP2        | Chr1p22.2         | 0.005 | 2.09  | 0.324 | 0.007 | 1.62  | 0.169 | 0.443 | 0.496       |
| 213713_s_at | Galactosidase, beta 1-like 2                           | GLB1L2      | Chr11q25          | 0.001 | -2.30 | 0.764 | 0.032 | 0.036 | 0.043 | 0.784 | 32          |
| 204187_at   | Guanosine monophosphate reductase                      | GMPR        | Chr6p23           | 0.006 | -2.23 | 0.399 | 0.011 | 0.218 | 0.344 | 0.642 | 38          |
| 215203_at   | Golgi autoantigen, golgin subfamily a, 4               | GOLGA4      | Chr3p22-p21.3     | 0.002 | -2.23 | 0.549 | 0.081 | 0.058 | 0.034 | 0.975 | 16          |
| 220993_s_at | G protein-coupled receptor 63                          | GPR63       | Chr6q16.1-q16.3   | 0.015 | 0.157 |       | 0.005 | -2.08 | 0.323 | 0.841 | 0.419       |
| 223582_at   | Monogenic, audiogenic seizure susceptibility I homolog | GPR98       | Chr5q13           | 0.004 | 3.57  | 0.485 | 0.128 | 0.057 | 0.063 | 0.850 | 14/10       |
| 226606_s_at | GTP binding protein 5 (putative)                       | GTPBP5      | Chr20q13.33       | 0.920 | 0.020 |       | 0.063 | 0.656 | 0.009 | -2.32 | 0.023       |
| 205523_at   | Hyaluronan and proteoglycan link protein I             | HAPLN1      | Chr5q14.3         | 0.003 | 7.37  | 0.330 | 0.007 | 3.48  | 0.359 | 0.153 | 0.986       |
| 205524_s_at | Hyaluronan and proteoglycan link protein I             | HAPLN1      |                   | 0.001 | 3.84  | 0.825 | 0.015 | 0.065 | 0.112 | 0.672 | 12,30       |
| 230204_at   | Hyaluronan and proteoglycan link protein I             | HAPLN1      |                   | 0.006 | 5.30  | 0.255 | 0.006 | 3.11  | 0.282 | 0.397 | 0.652       |
| 241710_at   | Transcribed locus                                      | hCG_1645220 | —                 | 0.047 | 0.486 |       | 0.566 | 0.852 | 0.006 | -2.06 | 0.046       |
| 202455_at   | Histone deacetylase 5                                  | HDAC5       | Chr17q21          | 0.000 | -2.89 | 0.562 | 0.028 | 0.008 | -1.98 | 0.034 | 0.563       |
| 242317_at   | Transcribed locus                                      | HIGD1A      | —                 | 0.010 | 2.41  | 0.583 | 0.204 | 0.379 | 0.018 | 0.376 | —           |
| 235456_at   | Histone 1, H2bd                                        | HIST1H2BD   | Chr6p21.3         | 0.017 | 0.016 |       | 0.001 | 2.10  | 0.738 | 0.705 | 0.971       |
| 232035_at   | Histone 1, H4 h                                        | HIST1H4H    | Chr6p21.3         | 0.019 | 0.040 |       | 0.933 | 0.078 | 0.009 | -2.04 | 0.520       |
| 214290_s_at | Histone cluster 2, H2aa3/4                             | HIST2H2AA   | Chr1q21.2         | 0.006 | 2.93  | 0.065 | 0.566 | 0.027 | 0.016 | 0.910 | 40          |
| 218280_x_at | Histone cluster 2, H2aa3/5                             | HIST2H2AA   | Chr1q21.3         | 0.004 | 2.50  | 0.058 | 0.514 | 0.020 | 0.012 | 0.924 |             |
| 227943_at   | Histone 2, H2aa                                        | HIST2H2AA   | Chr1q21.4         | 0.002 | 2.30  | 0.219 | 0.003 | 1.71  | 0.517 | 0.090 | 0.760       |
| 227614_at   | Hexokinase domain containing I                         | HKDC1       | Chr10q22.1        | 0.006 | 2.82  | 0.458 | 0.026 | 0.872 | 0.035 | 0.322 | 6,16        |
| 213359_at   | Heterogeneous nuclear ribonucleoprotein D              | HNRPD       | Chr4q21.1-2       | 0.008 | -2.77 | 0.005 | 2.86  | 0.950 | 0.002 | -3.56 | 0.029       |
| 241702_at   | Heterogeneous nuclear ribonucleoprotein D              | HNRPD       | Chr4q21.1-2       | 0.007 | -2.92 | 0.609 | 0.114 | 0.039 | 0.204 | 0.481 | 3,16,19     |
| 231050_at   | H-rev107-like protein 5                                | HRASLS5     | Chr11q13.2        | 0.000 | 3.99  | 0.942 | 0.024 | 0.153 | 0.007 | -2.53 | 0.584       |
| 221771_s_at | M-phase phosphoprotein, mpp8                           | HSMPP8      | Chr13q12.11       | 0.000 | -1.81 | 0.114 | 0.142 | 0.000 | -2.07 | 0.503 | 0.019       |
| 237377_at   | Insulin-like growth factor 1 receptor                  | IGF1R       | Chr15q26.3        | 0.004 | -2.40 | 0.038 | 0.639 | 0.025 | 0.007 | 2.23  | 0.747       |
| 213792_s_at | Insulin receptor                                       | INSR        | Chr19p13.3-13.2   | 0.207 | 0.001 | 2.60  | 0.093 | 0.107 | 0.001 | 2.37  | 0.194       |

Continued

Table A1 Continued

| Probe set ID | Gene title                                                           | Gene symbol | Chromosomal location | LP/LN P-value | FC    | OP/ON P-value | FC    | PS/NP P-value | FC    | ON/LN P-value | FC    | OP/LP P-value | FC    | O/L P-value | FC | Gene annotation codes |
|--------------|----------------------------------------------------------------------|-------------|----------------------|---------------|-------|---------------|-------|---------------|-------|---------------|-------|---------------|-------|-------------|----|-----------------------|
| 226216_at    | Insulin receptor                                                     | INSR        |                      | 0.773         |       | 0.009         | 2.69  | 0.075         |       | 0.469         |       | 0.026         |       | 0.208       |    | 14,18,24, 32          |
| 204686_at    | Insulin receptor substrate 1                                         | IRS1        | Chr2q36              | 0.817         |       | 0.001         | 2.59  | 0.015         |       | 0.036         |       | 0.218         |       | 0.818       |    | 14,18,24,32           |
| 225390_s_at  | Kruppel-like factor 13                                               | KLF13       | Chr15q12             | 0.001         | -2.23 | 0.076         |       | 0.001         | -1.76 | 0.574         |       | 0.130         |       | 0.870       |    | 3,4                   |
| 219331_s_at  | Kelch domain containing 8A                                           | KLHDC8A     | Chr1q32.1            | 0.006         | -3.14 | 0.655         |       | 0.022         |       | 0.132         |       | 0.291         |       | 0.585       |    | —                     |
| 221221_s_at  | Kelch-like 3 (Drosophila)                                            | KLHL3       | Chr5q31              | 0.449         |       | 0.008         | 2.30  | 0.168         |       | 0.063         |       | 0.104         |       | 0.964       |    | 29                    |
| 209894_at    | Leptin receptor                                                      | LEPR        | Chr1p31              | 0.750         |       | 0.005         | 2.00  | 0.098         |       | 0.002         | -2.25 | 0.401         |       | 0.023       |    | 36,37,35              |
| 223828_s_at  | Lectin, galactoside-binding, soluble, 12                             | LGALS12     | Chr11q13             | 0.003         | 5.31  | 0.541         |       | 0.020         |       | 0.556         |       | 0.042         |       | 0.508       |    | 17                    |
| 207240_s_at  | Luteinizing hormone/choriogonadotrophin receptor                     | LHCGR       | Chr2p21              | 0.006         | 2.98  | 0.188         |       | 0.005         | 2.14  | 0.578         |       | 0.254         |       | 0.963       |    | 10,14,24              |
| 1558080_s_at | Hypothetical protein LOC144871                                       | LOC144871   | Chr13q32.1           | 0.000         | 3.46  | 0.618         |       | 0.001         | 1.90  | 0.024         |       | 0.004         | -1.89 | 0.996       |    | —                     |
| 213089_at    | Hypothetical protein LOC153561                                       | LOC153561   | Chr5q13.2            | 0.009         | -2.22 | 0.778         |       | 0.063         |       | 0.656         |       | 0.037         |       | 0.381       |    | —                     |
| 211996_s_at  | KIAA0220-like protein                                                | LOC23117    | Chr16p12.2           | 0.009         | -2.53 | 0.931         |       | 0.088         |       | 0.291         |       | 0.068         |       | 0.736       |    | —                     |
| 225857_s_at  | Hypothetical LOC388796                                               | LOC388796   | Chr20q11.23          | 0.004         | -2.05 | 0.486         |       | 0.016         |       | 0.421         |       | 0.095         |       | 0.777       |    | —                     |
| 1558139_at   | LOC440156                                                            | LOC440156   | Chr14q11.1           | 0.002         | -3.10 | 0.634         |       | 0.067         |       | 0.025         |       | 0.139         |       | 0.482       |    | —                     |
| 214373_at    | Hypothetical gene supported by BC053580                              | LOC440996   | Chr3q29              | 0.003         | -2.16 | 0.653         |       | 0.065         |       | 0.018         |       | 0.200         |       | 0.361       |    | —                     |
| 209679_s_at  | Small trans-membrane and glycosylated protein                        | LOC57228    | Chr12q13.13          | 0.004         | -2.15 | 0.121         |       | 0.002         | -1.77 | 0.274         |       | 0.589         |       | 0.499       |    | —                     |
| 1557987_at   | PI-3-kinase-related kinase SMG-1                                     | LOC641298   | Chr16p12.2           | 0.006         | -2.85 | 0.167         |       | 0.350         |       | 0.036         |       | 0.034         |       | 0.946       |    | —                     |
| 1557360_at   | Leucine-rich PPR-motif containing                                    | LRPPRC      | Chr2p21              | 0.008         | -2.21 | 0.797         |       | 0.109         |       | 0.265         |       | 0.047         |       | 0.674       |    | 3,20                  |
| 225474_at    | Membrane associated guanylate kinase, WW and PDZ domain containing 1 | MAG11       | Chr3p14.1            | 0.001         | -2.55 | 0.084         |       | 0.272         |       | 0.020         |       | 0.003         | 2.13  | 0.727       |    | 1,9,12,13,17,22       |
| 242794_at    | Mastermind-like 3 (Drosophila)                                       | MAML3       | Chr4q28              | 0.008         | -2.00 | 0.171         |       | 0.389         |       | 0.047         |       | 0.036         |       | 0.994       |    | 3,4,11,24             |
| 212741_at    | Monoamine oxidase A                                                  | MAOA        | ChrXp11.3            | 0.014         |       | 0.059         |       | 0.622         |       | 0.003         | -2.02 | 0.193         |       | 0.245       |    | 36                    |
| 216237_s_at  | MCM5 minichromosome maintenance deficient 5, cell division cycle 46  | MCM5        | Chr22q13.1           | 0.001         | -2.79 | 0.430         |       | 0.005         | -1.87 | 0.064         |       | 0.328         |       | 0.401       |    | 3,5,16,40             |
| 208795_s_at  | MCM7 minichromosome maintenance deficient 7                          | MCM7        | Chr7q21.3-q22.1      | 0.002         | -2.36 | 0.625         |       | 0.011         |       | 0.033         |       | 0.476         |       | 0.241       |    | 3,5,16,40             |
| 210983_s_at  | MCM7 minichromosome maintenance deficient 8                          | MCM7        | Chr7q21.3-q22.1      | 0.002         | -2.73 | 0.289         |       | 0.004         | -1.99 | 0.026         |       | 0.980         |       | 0.100       |    | 3,5,16,40             |
| 239571_at    | MADS box transcription enhancer factor 2, polypeptide A              | MEF2A       | Chr15q26.3           | 0.080         |       | 0.022         |       | 0.588         |       | 0.186         |       | 0.008         | 2.64  | 0.291       |    | —                     |
| 223723_at    | Antigen p97                                                          | MF12        | Chr3q28-q29          | 0.001         | 2.31  | 0.287         |       | 0.005         | 1.68  | 0.448         |       | 0.076         |       | 0.762       |    | 37,48                 |
| 1565162_s_at | Microsomal glutathione S-transferase 1                               | MGST1       | Chr12p12.3-p12.1     | 0.008         | 2.37  | 0.888         |       | 0.063         |       | 0.399         |       | 0.062         |       | 0.633       |    | 36                    |
| 214246_x_at  | Misshapen-like kinase 1 (zebrafish)                                  | MINK1       | Chr17p13.2           | 0.000         | -2.73 | 0.171         |       | 0.088         |       | 0.001         | -2.23 | 0.028         |       | 0.403       |    | 2,6,9,24              |
| 203414_at    | Monocyte to macrophage differentiation-associated                    | MMD         | Chr17q               | 0.001         | 3.23  | 0.896         |       | 0.032         |       | 0.108         |       | 0.026         |       | 0.861       |    | —                     |
| 1555741_at   | Melanocortin 2 receptor accessory protein                            | MRAP        | Chr21q22.1           | 0.006         | 2.33  | 0.858         |       | 0.045         |       | 0.250         |       | 0.102         |       | 0.919       |    | —                     |
| 224323_s_at  | Maestro                                                              | MRO         | Chr18q21             | 0.008         | 11.32 | 0.234         |       | 0.301         |       | 0.036         |       | 0.066         |       | 0.787       |    | —                     |
| 224324_at    | Maestro                                                              | MRO         | Chr18q21             | 0.008         | 10.73 | 0.185         |       | 0.348         |       | 0.031         |       | 0.057         |       | 0.798       |    | —                     |
| 204331_s_at  | Mitochondrial ribosomal protein S12                                  | MIRPS12     | Chr19q13.1-q13.2     | 0.929         |       | 0.002         | -2.34 | 0.029         |       | 0.085         |       | 0.084         |       | 0.767       |    | 55, 56,57             |
| 225237_s_at  | Musashi homolog 2 (Drosophila)                                       | MSI2        | Chr17q23.2           | 0.006         | 2.65  | 0.094         |       | 0.485         |       | 0.033         |       | 0.019         |       | 0.925       |    | —                     |

|              |                                                                |                |                   |       |       |       |       |       |       |       |       |       |        |            |              |
|--------------|----------------------------------------------------------------|----------------|-------------------|-------|-------|-------|-------|-------|-------|-------|-------|-------|--------|------------|--------------|
| 211783_s_at  | Metastasis associated 1                                        | MTA1           | Chr14q32.3        | 0.009 | -2.12 | 0.404 | 0.214 | 0.077 | 0.071 | 0.921 | 3,40  |       |        |            |              |
| 202555_s_at  | Myosin, light polypeptide kinase                               | MYLK           | Chr3q21           | 0.116 |       | 0.052 | 0.929 | 0.005 | -2.13 | 0.611 | 0.115 | 6     |        |            |              |
| 242191_at    | Neuroblastoma breakpoint family, member 11/10                  | NBPFI1 / NBPFI | Chr1q21.1         | 0.002 | -2.68 | 0.504 | 0.085 | 0.024 |       | 0.083 | 0.595 | —     |        |            |              |
| 214693_x_at  | Neuroblastoma breakpoint family, member14-20                   | NBPFI4-20      | Chr1q12-21/p36.13 | 0.028 |       | 0.508 | 0.439 | 0.956 |       | 0.006 | 2.56  | 0.074 | —      |            |              |
| 213298_at    | Nuclear factor I/C (CCAAT-binding transcription factor)        | NFIC           | Chr19p13.3        | 0.007 | -2.20 | 0.438 | 0.188 | 0.093 |       | 0.053 |       | 0.962 | 3,4    |            |              |
| 202237_at    | Nicotinamide N-methyltransferase                               | NNMT           | Chr11q23.1        | 0.026 |       | 0.085 | 0.004 | 2.88  | 0.637 | 0.880 |       | 0.599 | 35     |            |              |
| 202238_s_at  | Nicotinamide N-methyltransferase                               | NNMT           |                   | 0.022 |       | 0.080 | 0.004 | 2.95  | 0.647 | 0.832 |       | 0.629 | 35     |            |              |
| 228723_at    | Neuroplastin                                                   | NPTN           | Chr15q22          | 0.014 |       | 0.283 | 0.446 |       | 0.406 | 0.007 | 2.06  | 0.217 | —      |            |              |
| 219147_s_at  | Nicotinamide riboside kinases                                  | NRK1           | Chr9q21.13        | 0.147 |       | 0.013 | 0.616 |       | 0.001 | -3.03 | 0.625 | 0.080 | 16,38  |            |              |
| 229225_at    | Neuropilin 2                                                   | NRP2           | Chr2q33.3         | 0.133 |       | 0.009 | 2.30  | 0.435 |       | 0.014 |       | 0.095 | 12, 25 |            |              |
| 200906_s_at  | Palladin                                                       | PALLD          | Chr4q32.3         | 0.004 | -3.54 | 0.742 | 0.086 |       | 0.167 | 0.041 |       | 0.790 | 12,37  |            |              |
| 204715_at    | Pannexin 1                                                     | PANX1          | Chr11q21          | 0.006 | 2.16  | 0.725 | 0.088 |       | 0.068 | 0.146 |       | 0.666 | —      |            |              |
| 226119_at    | Protein-L-isoaspartate O-methyltransferase domain containing 1 | PCMTD1         | Chr8q11.23        | 0.735 |       | 0.008 | 2.14  | 0.104 |       | 0.052 |       | 0.255 | 0.750  |            |              |
| 242844_at    | Protein geranylgeranyltransferase type I, beta subunit         | PGGT1B         | Chr5q22.3         | 0.006 | 2.28  | 0.985 |       | 0.059 |       | 0.172 |       | 0.105 | 0.974  | —          |              |
| 225321_s_at  | Paired immunoglobulin-like type 2 receptor beta                | PILRB          | Chr7q22.1         | 0.001 | -2.81 | 0.379 |       | 0.125 |       | 0.067 |       | 0.013 | 0.780  | —          |              |
| 203422_at    | Polymerase (DNA directed), delta 1, catalytic subunit 125 kDa  | POLD1          | Chr19q13.3        | 0.002 | -2.18 | 0.096 |       | 0.001 | -1.79 | 0.107 |       | 0.808 | 0.250  | 5,38,40,41 |              |
| 219926_at    | Popeye domain containing 3                                     | POPDC3         | Chr6q21           | 0.709 |       | 0.003 | -2.06 | 0.016 |       | 0.148 |       | 0.166 | 0.786  | —          |              |
| 226150_at    | Phosphatidic acid phosphatase type 2 domain containing 1B      | PPAPDC1B       | Chr8p12           | 0.007 | 2.05  | 0.144 |       | 0.514 |       | 0.235 |       | 0.003 | -2.18  | 0.241      | 3            |
| 209826_at    | Palmitoyl-protein thioesterase 2/ EGF-like-domain, multiple 8  | PPT2/EGFL8     | Chr6p21.3-31      | 0.000 | -2.21 | 0.507 |       | 0.064 |       | 0.068 |       | 0.007 | 1.73   | 0.711      | 24           |
| 235085_at    | Homolog of rat prigma of Rnd2                                  | PRAGMIN        | Chr8p23.1         | 0.000 | -2.05 | 0.177 |       | 0.000 | -1.60 | 0.036 |       | 0.319 | 0.326  | 6,16       |              |
| 216881_x_at  | Proline-rich protein BstNI subfamily 4                         | PRB4           | Chr12p13.2        | 0.623 |       | 0.002 | -2.05 | 0.087 |       | 0.010 | 1.82  | 0.286 | 0.445  | 10         |              |
| 201858_s_at  | Proteoglycan 1, secretory granule                              | PRG1           | Chr10q22.1        | 0.001 | 6.14  | 0.546 |       | 0.074 |       | 0.044 |       | 0.039 | 0.878  | 30         |              |
| 201859_at    | Proteoglycan 1, secretory granule                              | PRG1           | Chr10q22.1        | 0.004 | 3.67  | 0.804 |       | 0.063 |       | 0.061 |       | 0.148 | 0.628  | 30         |              |
| 226065_at    | Prickle-like 1 (Drosophila)                                    | PRICKLE1       | Chr12q12          | 0.007 | -2.71 | 0.269 |       | 0.285 |       | 0.074 |       | 0.034 | 0.891  | 1          |              |
| 213010_at    | Protein kinase C, delta binding protein                        | PRKCDBP        | Chr11p15.4        | 0.101 |       | 0.141 |       | 0.720 |       | 0.002 | 3.18  | 0.798 | 0.021  | 7          |              |
| 1558290_a_at | Pvt1 oncogene homolog, MYC activator (mouse)                   | PVT1           | Chr8q24.21        | 0.008 | -2.21 | 0.882 |       | 0.075 |       | 0.106 |       | 0.171 | 0.720  | —          |              |
| 206066_s_at  | RAD51 homolog C ( <i>Saccharomyces cerevisiae</i> )            | RAD51C         | Chr17q22-q23      | 0.152 |       | 0.001 | -2.01 | 0.236 |       | 0.003 | 1.93  | 0.095 | 0.475  | 5          |              |
| 1557675_at   | V-raf-1 murine leukemia viral oncogene homolog 1               | RAF1           | Chr3p25           | 0.001 | -2.01 | 0.076 |       | 0.433 |       | 0.090 |       | 0.001 | 2.03   | 0.303      | 2,6,17,18,37 |
| 1553185_at   | RAS and EF-hand domain containing                              | RASEF          | Chr9q21.32        | 0.056 |       | 0.182 |       | 0.886 |       | 0.739 |       | 0.005 | 2.57   | 0.081      | 12,16,47,49  |
| 1553186_x_at | RAS and EF-hand domain containing                              | RASEF          | Chr9q21.32        | 0.043 |       | 0.244 |       | 0.757 |       | 0.866 |       | 0.004 | 2.63   | 0.059      | 12,16,47,49  |
| 227223_at    | RNA-binding region (RNPI, RRM) containing 2                    | RBM39          | Chr20q11.22       | 0.012 |       | 0.053 |       | 0.847 |       | 0.221 |       | 0.002 | 2.53   | 0.178      | 3,19,20      |
| 238317_x_at  | RNA binding motif, single stranded interacting protein 1       | RBMS1          | Chr2q24.2         | 0.005 | 2.84  | 0.205 |       | 0.007 | 2.01  | 0.811 |       | 0.119 | 0.610  | —          |              |
| 228802_at    | RNA binding protein with multiple splicing 2                   | RBPMS2         | Chr15q22.31       | 0.003 | -1.91 | 0.012 |       | 0.701 |       | 0.001 | -2.03 | 0.024 | 0.501  | —          |              |

Continued

Table A1 Continued

| Probe set ID | Gene title                                                 | Gene symbol   | Chromosomal location | LP/LN P-value | FC    | OP/ON P-value | FC    | PS/NP P-value | FC    | ON/LN P-value | FC    | OP/LP P-value | FC    | O/L P-value | FC | Gene annotation codes |
|--------------|------------------------------------------------------------|---------------|----------------------|---------------|-------|---------------|-------|---------------|-------|---------------|-------|---------------|-------|-------------|----|-----------------------|
| 222666_s_at  | RNA terminal phosphate cyclase-like 1                      | RCL1          | Chr9p24.1-p23        | 0.356         |       | 0.006         | -2.26 | 0.016         |       | 0.053         |       | 0.990         |       | 0.360       |    | 23                    |
| 205407_at    | Reversion-inducing-cysteine-rich protein with kazal motifs | RECK          | Chr9p13-p12          | 0.797         |       | 0.003         | 2.44  | 0.049         |       | 0.116         |       | 0.072         |       | 0.673       |    | 5, 30                 |
| 226989_at    | RGM domain family, member B                                | RGMB          | Chr5q21.1            | 0.003         | -2.50 | 0.703         |       | 0.063         |       | 0.025         |       | 0.191         |       | 0.413       |    | 3,11,12,14            |
| 220486_x_at  | Transmembrane protein 164                                  | RP13-360B22.2 | ChrXq22.3            | 0.009         | 2.01  | 0.799         |       | 0.103         |       | 0.182         |       | 0.086         |       | 0.931       |    |                       |
| 236859_at    | Runt-related transcription factor 2                        | RUNX2         | Chr6p21              | 0.001         | 2.74  | 0.083         |       | 0.000         | 2.07  | 0.271         |       | 0.331         |       | 0.654       |    | 3,7                   |
| 236858_s_at  | Runt-related transcription factor 3                        | RUNX2         | —                    | 0.002         | 2.27  | 0.068         |       | 0.001         | 1.88  | 0.302         |       | 0.565         |       | 0.526       |    | 3,7                   |
| 206306_at    | Ryanodine receptor 3                                       | RYR3          | Chr15q14-q15         | 0.004         | 5.59  | 0.231         |       | 0.004         | 3.27  | 0.213         |       | 0.464         |       | 0.526       |    | 48                    |
| 202036_s_at  | Secreted frizzled-related protein 1                        | SFRP1         | Chr8p12-p11.1        | 0.968         |       | 0.002         | 3.85  | 0.022         |       | 0.368         |       | 0.014         |       | 0.191       |    | 1,14,17               |
| 202037_s_at  | Secreted frizzled-related protein 1                        | SFRP1         | Chr8p12-p11.1        | 0.075         |       | 0.055         |       | 0.006         | 2.11  | 0.570         |       | 0.492         |       | 0.266       |    | 1,14,17               |
| 222310_at    | Splicing factor, arginine/serine-rich 15                   | SFRS15        | Chr21q22.1           | 0.009         | -2.22 | 0.191         |       | 0.350         |       | 0.024         |       | 0.088         |       | 0.639       |    | —                     |
| 203889_at    | Secretory granule, neuroendocrine protein 1                | SGNE1         | Chr15q13-q14         | 0.044         |       | 0.150         |       | 0.868         |       | 0.569         |       | 0.005         | 2.34  | 0.116       |    | 9,21,36,43,45,51      |
| 230494_at    | Transcribed locus                                          | SLC20A1       | —                    | 0.000         | -2.45 | 0.909         |       | 0.008         | -1.53 | 0.011         |       | 0.024         |       | 0.653       |    |                       |
| 227176_at    | Solute carrier family 2, member 13                         | SLC2A13       | Chr12q12             | 0.035         |       | 0.605         |       | 0.465         |       | 0.683         |       | 0.004         | -2.37 | 0.027       |    | 56                    |
| 235763_at    | Solute carrier family 44, member 5                         | SLC44A5       | Chr1p31.1            | 0.009         | -4.13 | 0.351         |       | 0.276         |       | 0.158         |       | 0.025         |       | 0.639       |    | —                     |
| 225516_at    | Solute carrier family 7, member 2                          | SLC7A2        | Chr8p22-p21.3        | 0.001         | 4.91  | 0.740         |       | 0.012         |       | 0.045         |       | 0.191         |       | 0.478       |    | 18,42,43,45,46        |
| 239238_at    | SWI/SNF related, subfamily c, member 1                     | SMARCC1       | Chr3p23-p21          | 0.007         | -2.06 | 0.340         |       | 0.285         |       | 0.218         |       | 0.013         |       | 0.442       |    | —                     |
| 201563_at    | Sorbitol dehydrogenase                                     | SORD          | Chr15q15.3           | 0.117         |       | 0.007         | -2.10 | 0.404         |       | 0.026         |       | 0.039         |       | 0.973       |    | 33,44                 |
| 201418_s_at  | SRY (sex determining region Y)-box 4                       | SOX4          | Chr6p22.3            | 0.005         | -2.21 | 0.999         |       | 0.048         |       | 0.135         |       | 0.112         |       | 0.881       |    | 1,3                   |
| 213668_s_at  | SRY (sex determining region Y)-box 4                       | SOX4          | Chr6p22.4            | 0.004         | -3.52 | 0.735         |       | 0.030         |       | 0.285         |       | 0.086         |       | 0.855       |    | 1,4                   |
| 203017_s_at  | Synovial sarcoma, X breakpoint 2 interacting protein       | SSX2IP        | Chr1p22.3            | 0.879         |       | 0.009         | -2.10 | 0.097         |       | 0.041         |       | 0.446         |       | 0.526       |    | 12                    |
| 202761_s_at  | Spectrin repeat containing, nuclear envelope 2             | SYNE2         | Chr14q23.2           | 0.004         | -3.94 | 0.511         |       | 0.139         |       | 0.125         |       | 0.029         |       | 0.773       |    | 3,8,14,15,31          |
| 232914_s_at  | Synaptotagmin-like 2                                       | SYTL2         | Chr11q14             | 0.005         | 2.27  | 0.517         |       | 0.134         |       | 0.076         |       | 0.063         |       | 0.923       |    | 46                    |
| 204158_s_at  | T-cell, immune regulator 1, ATPase, isoform 3              | TCIRG1        | Chr11q13.2           | 0.007         | -2.10 | 0.195         |       | 0.297         |       | 0.010         | -2.04 | 0.161         |       | 0.358       |    | 37,48                 |
| 206286_s_at  | Teratocarcinoma-derived growth factor 1                    | TDGF1         | Chr3p21.31           | 0.000         | -3.84 | 0.056         |       | 0.140         |       | 0.000         | -5.32 | 0.422         |       | 0.013       |    | 2,12,24               |
| 209651_at    | Transforming growth factor beta 1 induced transcript 1     | TGFB11        | Chr16p11.2           | 0.005         | -3.26 | 0.722         |       | 0.086         |       | 0.082         |       | 0.108         |       | 0.787       |    | 1,3,4,7,8,12          |
| 226319_s_at  | THO complex 4                                              | THOC4         | Chr17q25.3           | 0.561         |       | 0.003         | -2.57 | 0.012         |       | 0.158         |       | 0.247         |       | 0.875       |    | 19,20                 |
| 224560_at    | TIMP metalloproteinase inhibitor 2                         | TIMP2         | Chr17q25             | 0.077         |       | 0.017         |       | 0.561         |       | 0.131         |       | 0.009         | 2.23  | 0.371       |    | 30                    |
| 206271_at    | Toll-like receptor 3                                       | TLR3          | Chr4q35              | 0.009         | 1.91  | 0.907         |       | 0.142         |       | 0.679         |       | 0.003         | -2.05 | 0.043       |    | 9,14,27,28            |
| 219569_s_at  | Transmembrane protein 22                                   | TMEM22        | Chr3q22.3            | 0.009         | 2.10  | 0.426         |       | 0.198         |       | 0.055         |       | 0.110         |       | 0.727       |    | —                     |
| 227062_at    | Trophoblast-derived non-coding RNA                         | TncRNA        | Chr11q13.1           | 0.014         |       | 0.128         |       | 0.636         |       | 0.241         |       | 0.005         | 3.08  | 0.269       |    | —                     |
| 234989_at    | Trophoblast-derived non-coding RNA                         | TncRNA        | Chr11q13.1           | 0.005         | -2.48 | 0.169         |       | 0.353         |       | 0.078         |       | 0.011         |       | 0.645       |    | —                     |
| 228737_at    | TOX high mobility group box family member 2                | TOX2          | Chr20q13.12          | 0.007         | -2.44 | 0.505         |       | 0.018         |       | 0.276         |       | 0.229         |       | 0.850       |    | 3                     |
| 220167_s_at  | TP53TG3 protein                                            | TP53TG3       | Chr16p13             | 0.004         | -2.64 | 0.931         |       | 0.043         |       | 0.020         |       | 0.435         |       | 0.216       |    | —                     |
| 219324_at    | TRIO and F-actin binding protein/nucleolar protein 12      | TRIOBP/NOL12  | Chr22q13.1           | 0.339         |       | 0.000         | -2.11 | 0.024         |       | 0.004         | 1.59  | 0.006         | -1.53 | 0.830       |    | 37                    |
| 244610_x_at  | Ubiquitin-conjugating enzyme E2E 2 (UBC4/5 homolog, yeast) | UBE2E2        | Chr3p24.2            | 0.034         |       | 0.141         |       | 0.786         |       | 0.343         |       | 0.009         | 2.10  | 0.241       |    |                       |



|             |                                                             |         |                 |       |       |       |       |       |       |       |         |       |       |
|-------------|-------------------------------------------------------------|---------|-----------------|-------|-------|-------|-------|-------|-------|-------|---------|-------|-------|
| 218533_s_at | Uridine-cytidine kinase 1-like 1                            | UCKLI   | Chr20q13.33     | 0.009 | -2.30 | 0.682 | 0.110 | 0.061 | 0.192 | 0.577 | 16,32   |       |       |
| 212980_at   | Ubiquitin-specific peptidase 34                             | USP34   | Chr2p15         | 0.028 |       | 0.120 | 0.780 | 0.266 | 0.009 | 2.50  | 0.291   | 29    |       |
| 226176_s_at | Ubiquitin-specific peptidase 42                             | USP42   | Chr7p22.1       | 0.006 | -2.05 | 0.625 | 0.100 | 0.027 | 0.253 | 0.371 | 29      |       |       |
| 227894_at   | WD repeat domain 90                                         | WDR90   | Chr16p13.3      | 0.000 | -2.56 | 0.937 | 0.014 | 0.006 | -1.92 | 0.166 | 0.273   |       |       |
| 232389_at   | WAS/WASL interacting protein family, member 3               | WIPF3   | —               | 0.000 | -2.22 | 0.401 | 0.001 | -1.62 | 0.007 | -1.66 | 0.364   | 0.169 | 37,58 |
| 205990_s_at | Wingless-type MMTV integration site family, member 5A       | WNT5A   | Chr3p21-p14     | 0.001 | 4.71  | 0.580 | 0.012 | 0.435 | 0.013 | 0.435 | 1,14,24 |       |       |
| 205883_at   | Zinc finger and BTB domain containing 16                    | ZBTB16  | Chr11q23.1      | 0.005 | -2.57 | 0.802 | 0.096 | 0.287 | 0.030 | 0.572 | 3,17,29 |       |       |
| 205383_s_at | Zinc finger and BTB domain containing 20                    | ZBTB20  | Chr3q13.2       | 0.000 | -2.11 | 0.550 | 0.055 | 0.078 | 0.006 | 1.69  | 0.653   | 3     |       |
| 235847_at   | Zinc finger, AN1-type domain 3                              | ZFAND3  | Chr6pter-p22.3  | 0.039 |       | 0.082 | 0.986 | 0.364 | 0.005 | 2.31  | 0.170   |       |       |
| 206240_s_at | Zinc finger protein 136 (clone pHZ-20)                      | ZNF136  | Chr19p13.2-12   | 0.004 | -2.22 | 0.759 | 0.072 | 0.077 | 0.104 | 0.775 | 3,4     |       |       |
| 229765_at   | Transcribed locus                                           | ZNF207  | —               | 0.507 |       | 0.008 | 2.16  | 0.147 | 0.078 | 0.104 | 0.908   | 3     |       |
| 219379_x_at | Zinc finger protein 358                                     | ZNF358  | Chr19p13.2      | 0.008 | -2.04 | 0.948 | 0.066 | 0.123 | 0.168 | 0.756 | 3       |       |       |
| 55872_at    | Zinc finger protein 512B                                    | ZNF512B | Chr20q13.33     | 0.002 | -2.20 | 0.189 | 0.175 | 0.004 | -2.04 | 0.099 | 0.323   | 3     |       |
| 220617_s_at | Zinc finger protein 532                                     | ZNF532  | Chr18q21.32     | 0.001 | -2.11 | 0.564 | 0.006 | -1.55 | 0.023 | 0.376 | 0.250   | 3     |       |
| 229019_at   | Zinc finger protein 533                                     | ZNF533  | Chr2q31.2-q31.3 | 0.010 | -2.49 | 0.427 | 0.200 | 0.055 | 0.115 | 0.714 | —       |       |       |
| 210679_x_at | Transcribed locus                                           | —       | —               | 0.006 | -1.74 | 0.024 | 0.890 | 0.136 | 0.001 | 2.01  | 0.173   |       |       |
| 215204_at   | Transcribed locus                                           | —       | —               | 0.006 | -2.49 | 0.717 | 0.032 | 0.278 | 0.117 | 0.937 |         |       |       |
| 217679_x_at | Neuronal thread protein AD7c-NTP ( <i>Homo sapiens</i> )    | —       | —               | 0.002 | -2.03 | 0.076 | 0.501 | 0.163 | 0.001 | 2.18  | 0.182   |       |       |
| 225239_at   | Transcribed locus                                           | —       | —               | 0.003 | -2.57 | 0.083 | 0.430 | 0.041 | 0.006 | 2.29  | 0.655   |       |       |
| 226192_at   | Predicted: similar to p40 ( <i>H. sapiens</i> )             | —       | —               | 0.006 | -2.36 | 0.282 | 0.006 | -1.78 | 0.244 | 0.423 | 0.595   |       |       |
| 227576_at   | cDNA DKFZp686K1098                                          | —       | —               | 0.048 |       | 0.076 | 0.956 | 0.341 | 0.006 | 2.03  | 0.196   |       |       |
| 227762_at   | Transcribed locus                                           | —       | —               | 0.003 | -2.08 | 0.122 | 0.492 | 0.315 | 0.001 | 2.35  | 0.116   |       |       |
| 228854_at   | Transcribed locus                                           | —       | —               | 0.006 | -2.39 | 0.018 | 0.882 | 0.042 | 0.002 | 2.62  | 0.447   |       |       |
| 229849_at   | Predicted: similar to CRI16 (Pan troglodytes)               | —       | —               | 0.004 | -2.48 | 0.837 | 0.033 | 0.188 | 0.100 | 0.987 | 3       |       |       |
| 232156_at   | Transcribed locus                                           | —       | —               | 0.001 | 2.11  | 0.514 | 0.014 | 0.508 | 0.026 | 0.484 |         |       |       |
| 232397_at   | <i>Homo sapiens</i> , clone IMAGE:4332461, mRNA             | —       | —               | 0.015 |       | 0.049 | 0.004 | 2.27  | 0.543 | 0.213 | 0.436   |       |       |
| 232890_at   | Neuronal thread protein AD7c-NTP                            | —       | —               | 0.040 |       | 0.003 | 2.18  | 0.467 | 0.012 | 0.010 | 0.861   | —     |       |
| 235028_at   | Transcribed locus                                           | —       | —               | 0.006 | -4.02 | 0.271 | 0.245 | 0.039 | 0.055 | 0.834 | —       |       |       |
| 236934_at   | Transcribed locus                                           | —       | —               | 0.901 |       | 0.037 | 0.088 | 0.346 | 0.005 | 2.02  | 0.007   | -1.66 | —     |
| 237154_at   | Transcribed locus                                           | —       | —               | 0.002 | 2.09  | 0.022 | 0.646 | 0.013 | 0.003 | -1.97 | 0.768   | —     |       |
| 238717_at   | CDNA FLJ31114 fis, clone IMR322000379                       | —       | —               | 0.287 |       | 0.059 | 0.405 | 0.915 | 0.004 | -2.74 | 0.027   | —     |       |
| 239587_at   | Transcribed locus                                           | —       | —               | 0.018 |       | 0.305 | 0.518 | 0.718 | 0.003 | -2.14 | 0.084   | —     |       |
| 239798_at   | Transcribed locus                                           | —       | —               | 0.094 |       | 0.034 | 0.005 | 2.05  | 0.793 | 0.472 | 0.345   | —     |       |
| 241600_at   | Similar to CRI16 (Pan troglodytes)                          | —       | —               | 0.007 | -2.27 | 0.433 | 0.191 | 0.085 | 0.061 | 0.979 | —       |       |       |
| 242080_at   | Hypothetical protein KIAA0563                               | —       | —               | 0.003 | -2.17 | 0.322 | 0.208 | 0.136 | 0.009 | 1.91  | 0.517   | —     |       |
| 242405_at   | Transcribed locus                                           | —       | —               | 0.209 |       | 0.085 | 0.568 | 0.880 | 0.007 | 2.14  | 0.059   | —     |       |
| 242907_at   | Similar to unactive progesterone receptor, 23 kDa isoform 4 | —       | chr1p22.2       | 0.004 | 2.98  | 0.123 | 0.002 | 2.25  | 0.353 | 0.498 | 0.622   | —     |       |
| 243907_at   | Transcribed locus                                           | —       | —               | 0.008 | -2.03 | 0.741 | 0.092 | 0.062 | 0.196 | 0.572 | —       |       |       |
| 244661_at   | EST, multiple location, contains repetitive sequences       | —       | —               | 0.248 |       | 0.126 | 0.571 | 0.567 | 0.003 | -2.21 | 0.010   | 1.62  | —     |

**Gene annotation codes**

- 1 Wnt-signaling pathway
- 2 MAPK-signaling pathway
- 3 Regulation of transcription
- 4 Regulation of transcription from RNA polymerase II promoter
- 5 Cell cycle/G1\_to\_S\_cell\_cycle/regulation of mitosis
- 6 Protein kinase activity, protein amino acid phosphorylation
- 7 TGF\_β receptor-signaling pathway
- 8 Androgen receptor-signaling pathway/estrogen receptor-signaling pathway/steroid hormone receptor activity
- 9 NF-κB cascade, JNK cascade
- 10 G-protein-coupled receptor
- 11 Notch-signaling pathway, BMP-signaling pathway
- 12 Cell adhesion, cell migration
- 13 Interleukin-6 receptor pathway
- 14 Signal transduction
- 15 Chemotaxis/cell-cell signaling
- 16 ATP binding/nucleotide binding
- 17 Apoptosis
- 18 Insulin receptor-signaling pathway
- 19 RNA binding, processing, splicing
- 20 mRNA processing, RNA transport
- 21 Response to unfolded protein
- 22 Protein complex assembly
- 23 Ribosome biogenesis and assembly
- 24 Development/male gonad development
- 25 Angiogenesis
- 26 Antigen processing and presentation of endogenous peptide antigen via MHC class I
- 27 Immune response/Complement\_Activation\_Classical pathway
- 28 Inflammatory response
- 29 Ubiquitin cycle
- 30 Extracellular matrix structural constituent/Matrix\_Metalloproteinases
- 31 Known Ovarian\_Infertility\_Genes
- 32 Carbohydrate metabolic process
- 33 Glucose metabolism
- 34 Steroid biosynthetic process
- 35 Cholesterol metabolic process/lipid metabolic process/lipid and lipoprotein metabolism/glycerophospholipid metabolism
- 36 Energy reserve/metabolic process
- 37 Actin cytoskeleton organization and biogenesis
- 38 Pyridine nucleotide biosynthetic process/purine metabolism/nucleotide metabolic process
- 39 Response to estrogen stimulus
- 40 Establishment and/or maintenance of chromatin architecture
- 41 Telomere maintenance
- 42 Regulated by insulin
- 43 Glucose intolerance/insulin resistance
- 44 Response to hormone stimulus
- 45 Obesity/body weight
- 46 Organ morphogenesis/fat cell differentiation
- 47 Protein transport

*Continued*

*Continued***Gene annotation codes**

- 48 Ion transport
- 49 Calcium ion binding
- 50 ER-nuclear-signaling pathway
- 51 Regulation of hormone secretion
- 52 Chondroitin sulfate biosynthetic process
- 53 Heat shock protein binding
- 54 Glycosaminoglycan biosynthetic process
- 55 Translation
- 56 Transmembrane transporter/carbohydrate transport
- 57 Mitochondrial ribosomal protein
- 58 Spermatogenesis
- 59 Histone mRNA 3'-end processing

For each of the probe set ID, the columns detail the gene symbol, the full gene name and the chromosomal location. The numerical value represents the fold change of the probe set that was differentially expressed in that comparison. The genes are presented in their alphabetical order. Due to redundancy of the oligonucleotide probes on the chips, in several cases, the same gene is represented by more than one probe set. Where a gene is present in more than one list, its FC value is presented several times.

*Submitted on October 6, 2008; resubmitted on December 6, 2008; accepted on December 19, 2008*
